# Supplementary material for: Fatty acid synthase overexpression: target for therapy and reversal of chemoresistance in ovarian cancer
Source: PubMed Central journal article supplement (PMC4504229; doi:10.1186/s12967-015-0511-3), 2015-05-07
Supplement: 12967_2015_511_MOESM2_ESM.pdf [file 12967_2015_511_MOESM2_ESM.pdf]

**A2 Table S1.** Quantification of protein expression by the analyzing software Image J®

| Hey   |      |      |      |         | Hey    |          |          |              |
|-------|------|------|------|---------|--------|----------|----------|--------------|
|       | ∅    | cis  | cer  | cis+cer | ∅ + PA | cis + PA | cer + PA | cis+cer + PA |
| p-AKT | 1.00 | 0.89 | 0.79 | 0.54    | 1.00   | 1.17     | 0.96     | 1.00         |
| AKT   | 1.00 | 0.82 | 0.67 | 0.58    | 1.00   | 1.00     | 0.96     | 0.74         |
| p-ERK | 1.00 | 0.49 | 0.30 | 0.26    | 1.00   | 1.06     | 0.95     | 0.87         |
| ERK   | 1.00 | 0.81 | 0.86 | 0.95    | 1.00   | 1.00     | 1.04     | 1.05         |

  

| Hey cis |      |      |      |         | Hey cis |          |          |              |
|---------|------|------|------|---------|---------|----------|----------|--------------|
|         | ∅    | cis  | cer  | cis+cer | ∅ + PA  | cis + PA | cer + PA | cis+cer + PA |
| p-AKT   | 1.00 | 0.77 | 0.73 | 0.71    | 1.00    | 1.19     | 1.32     | 1.31         |
| AKT     | 1.00 | 0.78 | 0.75 | 0.67    | 1.00    | 0.80     | 0.82     | 0.82         |
| p-ERK   | 1.00 | 0.57 | 0.64 | 0.62    | 1.00    | 0.98     | 0.80     | 0.94         |
| ERK     | 1.00 | 0.84 | 0.87 | 0.79    | 1.00    | 0.89     | 0.93     | 0.93         |

**A2 Table S2.** IC50 values of cisplatin in primary culture combined with cerulenin treatment

|      | ∅                | + 8.75 µmol/L cer (% reduction) | + 17.5 µmol/L cer (% reduction) |
|------|------------------|---------------------------------|---------------------------------|
| G3#1 | 4.11 µmol/L cis  | 4.05 µmol/L cis*** (1.5%)       | 1.61 µmol/L cis*** (60.8%)      |
| G3#2 | 24.50 µmol/L cis | 14.44 µmol/L cis* (41.1%)       | 8.51 µmol/L cis** (65.3%)       |
| G3#3 | 37.51 µmol/L cis | 24.32 µmol/L cis* (35.2%)       | 5.24 µmol/L cis*** (86.0%)      |
| G3#4 | 9.86 µmol/L cis  | 7.02 µmol/L cis** (28.8%)       | 0.82 µmol/L cis** (91.7%)       |
| G3#5 | 30.32 µmol/L cis | 29.61 µmol/L cis*** (2.3%)      | 17.01 µmol/L cis*** (43.9%)     |
| G3#6 | 3.76 µmol/L cis  | 4.14 µmol/L cis* (-)            | 1.65 µmol/L cis** (56.1%)       |
| C1   | 13.54 µmol/L cis | 15.05 µmol/L cis** (-)          | 9.19 µmol/L cis** (32.1%)       |
| C2   | 34.33 µmol/L cis | 32.96 µmol/L cis** (4.0%)       | 29.63 µmol/L cis* (13.7%)       |

(\*\*\*  $P < 0.001$ ; \*\*  $P < 0.01$ ; \*  $P < 0.05$ )
